## Novel P450c17 Mutation H373D Causing Combined 17 $\alpha$ -Hydroxylase/17,20-Lyase Deficiency

Tanee Sahakitrungruang,\* Meng Kian Tee,\* Phyllis W. Speiser, and Walter L. Miller

Division of Endocrinology (T.S., M.K.T., W.L.M.), Department of Pediatrics, University of California San Francisco, San Francisco, California 94143-0978; and Division of Pediatric Endocrinology (P.W.S.), Schneider Children's Hospital, New York University, New Hyde Park, New York 11040

**Context:** Combined 17 $\alpha$ -hydroxylase/17,20-lyase deficiency is a rare autosomal recessive form of congenital adrenal hyperplasia presenting with hypertension and sexual infantilism. This disorder is caused by defects in P450c17, encoded by the *CYP17A1* gene.

**Objective:** We describe a 14-yr-old female with clinical and hormonal features of 17 $\alpha$ -hydroxylase/17,20-lyase deficiency and identify and characterize the activities of her *CYP17A1* mutations.

**Methods:** The coding regions of the *CYP17A1* gene were amplified by PCR and sequenced. Mutations were recreated in P450c17 cDNA expression vectors; activities in transfected COS-1 cells were assayed by conversion of radiolabeled precursor steroids. One mutant was also expressed in *Escherichia coli*, and the reduced adsorption spectrum was measured.

**Results:** The patient carried the previously described mutation R96W and the novel missense mutation H373D. Neither mutant had detectable activity when expressed in COS-1 cells. Membrane preparations from *E. coli* expressing the H373D mutant vector produced an absorption peak at 420 nm, whereas the wild-type produced a peak at 450 nm, suggesting that the H373D mutation interferes with protein folding.

**Conclusion:** The novel P450c17 mutation H373D abolished enzyme activity because of protein misfolding. These data indicate an important role for this residue in P450c17 activity. (*J Clin Endocrinol Metab* 94: 3089–3092, 2009)

P450c17 is the single microsomal cytochrome P450 enzyme that catalyzes both the 17 $\alpha$ -hydroxylation required to produce the 17-hydroxy 21-carbon precursors of cortisol, 17-hydroxyprenolone (17OH-Preg) and 17-hydroxyprogesterone (17OHP), and the 17,20-lyase activity needed to produce 19-carbon precursors of sex steroids (1, 2). P450c17 is encoded by a gene termed *CYP17A1*, consisting of eight exons (3) and located on chromosome 10q24.3 (4). *CYP17A1* mutations cause 17 $\alpha$ -hydroxylase deficiency, a rare form of congenital adrenal hyperplasia characterized by sexual infantilism, 46,XY sex reversal, hypertension, and high ratios of C21 to C19 steroids (5). The lack of 17 $\alpha$ -hydroxylase activity disrupts cortisol secretion, driving the compensatory overproduction of a glucocorticoid, corticosterone, and a mineralocorticoid, deoxycorticosterone,

causing hypertension and hypokalemia. Rare patients may also have isolated 17,20-lyase deficiency, characterized by low C19 steroids with normal cortisol (6–8). We describe a novel missense mutation and functional characterization of the *CYP17A1* gene in a 14-yr-old girl with hypertension and sexual infantilism.

### Subject and Methods

#### Case report

A Caucasian female was evaluated for hypertension and palpitations at the age of 7 yr. The mother's ethnicity is German-French Canadian, and the father's ethnicity is Scottish-Irish-Italian; there is no known consanguinity. Neither the 13-yr-old brother nor the patient's parents are hypertensive. At age 7, her random ambulatory blood pressure (BP) was

ISSN Print 0021-972X ISSN Online 1945-7197

Printed in U.S.A.

Copyright © 2009 by The Endocrine Society

doi: 10.1210/jc.2009-0645 Received March 24, 2009. Accepted May 18, 2009.

First Published Online May 26, 2009

\* T.S. and M.K.T. contributed equally to this work.

Abbreviations: BP, Blood pressure; DHEA, dehydroepiandrosterone; 17OHP, 17-hydroxyprogesterone; 17OH-Preg, 17-hydroxyprenolone.

118/84 mm Hg (95th/99th percentiles) with an unremarkable electrocardiogram. Further evaluation was delayed until age 11, when she was admitted for viral pneumonia with a BP of 149/101 mm Hg (>99th percentile), ranging as high as 157/107 mm Hg during hospitalization. Subsequent BPs ranged from 117/69 to 130/90 mm Hg; electrocardiogram and renal sonogram were normal. Her serum sodium was 142 mEq/liter, and the potassium was 3.3 mEq/liter; plasma renin activity was undetectable (<0.1 ng/ml · h), and aldosterone was elevated (20.9 ng/dl). Blood urea nitrogen and creatinine were normal. CT angiography of the abdomen showed no renal artery stenosis. Glucocorticoid-remediable aldosteronism was diagnosed, but *CYP11B1* sequencing was normal.

At age 11, she was referred to one of us (P.W.S.). Physical examination showed height 150.8 cm (+ 0.6 SD), weight 47.7 kg (+ 0.9 SD), and Tanner stage 1 without clitoromegaly or genital ambiguity. Ambulatory monitoring for 24 h revealed an average BP of 147/94 mm Hg. Cosyntropin stimulation (Table 1) was notable for extremely high corticosterone and 18-hydroxycorticosterone levels; slightly elevated pregnenolone, progesterone, and deoxycorticosterone; and low levels of 17OH-Preg, 17OHP, cortisol, 11-deoxycortisol, aldosterone, and dehydroepiandrosterone (DHEA). Plasma renin activity was undetectable. Karyotype was 46,XX. Estradiol was low at 0.23 ng/dl with elevated gonadotropins (FSH and LH, 63 and 25 mIU/ml, respectively). Ultrasonography revealed hypoplastic uterus and ovaries with normal-sized kidneys and adrenals. Her bone age was 7 10/12 yr at chronological age 14 4/12 yr. Sodium restriction was continued, and oral hydrocortisone (7.5 mg twice daily; 10 mg/m<sup>2</sup> · d) was started, resulting in a somewhat lower, but still elevated BP, averaging 134/89 mm Hg. Subsequent treatment with oral prednisolone (5 mg twice daily; equivalent to ~40 mg hydrocortisone; 26 mg/m<sup>2</sup> · d) improved BP into the normal range and suppressed corticosterone, whereas plasma renin activity became measurable. Low-dose transdermal estrogen replacement was started.

DNA sequencing

With informed consent, leukocyte genomic DNA was extracted, and all eight exons of the *CYP17A1* gene were amplified by PCR using previously described primers and conditions (9). The sizes of the PCR products were confirmed by electrophoresis in 1.5% agarose gel. The PCR products were treated with exonuclease I and shrimp alkaline phosphatase (ExoSAP-IT; USP Corp., Cleveland, OH) and sequenced, and the data were analyzed using Sequencher version 4.2 (Gene Codes, Ann Arbor, MI).

Construction of CYP17A1 expression vectors

The R96W mutant was recreated in the human P450c17cDNA (2) by PCR-based, site-directed mutagenesis using primers 5'-AAGGACT-

TCTCTGGGTGGCCTCAAATGGCAA-3' and 5'-TTGCCATTGAG-GCCACCCAGAGAAGTCCTT-3' and cloned in pcDNA3 (Invitrogen, Carlsbad, CA). The H373D mutant was created similarly using 5'-CCTAT-GCTCATCCCCGACAAGGCCAACGTTG-3' and 5'-CAACGTTGGC-CTTGTCGGGGATGAGCATAGG-3'. The methylated parental wild-type cDNA was digested with 10 U *DpnI* at 37 C for 180 min, and the remaining unmethylated mutagenized cDNA plasmid was used to transform *Escherichia coli* DH5α. The mutagenized cDNAs were verified by sequencing.

Transient transfection of COS-1 cells and assays for enzyme activities

COS-1 monkey kidney cells were grown in DMEM supplemented with 10% fetal calf serum and antibiotics at 37 C in a humidified 5% CO<sub>2</sub> incubator. Cells were seeded onto six-well plates (Falcon 3046; BD Biosciences, Lincoln Park, NJ) at approximately 50% confluence and transfected with 400 ng of pcDNA3-c17 plasmids using Effectene (QIAGEN, Valencia, CA). Cells incubated for 65 h after transfection were assayed for P450c17 activities. Cells were washed three times with serum-free DMEM and incubated with 0.5 ml medium containing labeled steroid; 17α-hydroxylase assays used 100,000 cpm [<sup>14</sup>C]progesterone (PerkinElmer, Norwalk, CT) for 40 min, and 17,20-lyase assays used 100,000 cpm [<sup>3</sup>H]17OH-Preg (American Radiolabeled Chemicals, St. Louis, MO) for 80 min. Medium was collected, and steroids were extracted and separated by thin-layer chromatography as described (10) and quantitated by phosphorimaging using Scion Image software (Scion Corp., Frederick, MD).

Bacterial expression of P450c17, preparation of membranes, and spectral studies

The pCWori-mod(His)4 expression plasmid containing the cDNA for human P450c17 with amino-terminal modifications that facilitate bacterial expression (11) was transformed into *E. coli* JM109. Ampicillin-resistant colonies were grown at 30 C to OD = 0.4, and P450c17 expression was induced with 0.4 mM isopropyl-1-thio-β-d-galactopyranoside at 28 C for 60 h. The bacteria were treated with lysozyme (0.5 mg/ml) and EDTA [0.1 mM (pH 8.0)] to generate spheroplasts. The spheroplasts were pelleted by centrifugation (5000 × g for 15 min); resuspended in 100 mM potassium phosphate (pH 7.6), 6 mM MgOAc, 0.1 mM dithiothreitol, 20% (vol/vol) glycerol, 1 mM phenylmethylsulfonylfluoride, and 0.1 mM DNase I; and disrupted by sonication (20 sec on/off cycles for 10 min at 40% power) (model 550; Fisher Scientific, Pittsburgh, PA). The lysate was cleared of cellular debris by centrifugation at 12,000 × g for 15 min, and then the membranes in the supernatant were pelleted at 150,000 × g for 90 min at 4 C. Membranes were re-

TABLE 1. Basal and 60-min post-cosyntropin adrenal steroid profile

| Steroids                 | Basal  | Post-cosyntropin | Reference values<br>(basal, prepubertal female) | Reference values<br>(stimulated, prepubertal female) |
|--------------------------|--------|------------------|-------------------------------------------------|------------------------------------------------------|
| Cortisol (μg/dl)         | <1     | <1               | 3–21                                            | 20–31                                                |
| Deoxycorticosterone      | 36     | 68               | 2–34                                            | 22–120                                               |
| 11-Deoxycortisol         | <10    | 15               | 20–155                                          | 95–254                                               |
| Corticosterone           | 13,900 | 37,300           | 70–1,860                                        | 2,520–5,650                                          |
| 18-Hydroxycorticosterone | 423    | 894              | 2.4–10.5                                        | 95–289                                               |
| Aldosterone              | 2.8    | 4.3              | 3–35                                            | 14–42                                                |
| Pregnenolone             | 320    | 325              | 20–140                                          | 39–130                                               |
| Progesterone             | 42     | 73               | <10–26                                          | 48–171                                               |
| 17OH-Preg                | 42     | 45               | 10–186                                          | 70–656                                               |
| 17OHP                    | <10    | <10              | 3–90                                            | 85–280                                               |
| DHEA                     | 70     | 75               | 31–345                                          | 69–322                                               |
| Testosterone             | 4.3    | 4.9              | <3–10                                           | <sup>a</sup>                                         |

Values are in nanograms per deciliter, unless otherwise indicated. Reference values are from Esoterix Inc. (Calabasas Hills, CA), where the assays were performed.

<sup>a</sup> Testosterone is not significantly changed after ACTH.

suspended in 50 mM potassium phosphate (pH 7.4) and 20% (vol/vol) glycerol. An aliquot of membranes corresponding to 2 mg of protein was made up to 2 ml with the same buffer, and the mixture was divided equally between two cuvettes. Sodium dithionite 50 mg was added to each cuvette, and the baseline spectrum was recorded between 400 and 500 nm. CO was then bubbled through the sample cuvette for 2 min to obtain the reduced CO spectrum.

## Results

Sequencing the *CYP17A1* gene from the patient's DNA showed compound heterozygosity for the mutations 458C>T in exon 1 (NCBI reference sequence NG\_007955), changing arginine 96 to tryptophan (R96W); and 5001C>G in exon 6, changing histidine 373 to aspartic acid (H373D). Parental DNA was not available for investigation. The R96W mutation has been reported previously (12); the H373D mutation is novel.

To assess the activities of these mutations, we constructed vectors for their expression and transfected these into nonsteroidogenic COS-1 cells and assessed their 17 $\alpha$ -hydroxylase and 17,20-lyase activities by examining the conversions of radiolabeled progesterone to 17OHP (hydroxylase) and 17OH-Preg to DHEA (lyase) (10, 13). Neither the R96W nor H373D mutants had detectable 17 $\alpha$ -hydroxylase or 17,20-lyase activity, whereas the wild-type P450c17 showed robust activity (Fig. 1A).

A previous study suggested that a different mutant at position 373, H373L, was inactive because the mutant protein failed to bind the heme group found in all cytochrome P450 enzymes (9). Therefore, we prepared membrane fractions from *E. coli* expressing either wild-type or H373D P450c17 and assayed heme incorporation by CO-induced difference spectra (14). The wild-type P450c17 showed a characteristic peak at 449 nm upon addition of CO, whereas the H373D mutant vector produced a peak at 420 nm, typical of a denatured P450 (Fig. 1B). These

results suggest that the H373D mutation causes a defect in protein folding.

## Discussion

P450c17 catalyzes 17 $\alpha$ -hydroxylase and 17,20-lyase activities and hence is the qualitative regulator of steroidogenesis that determines the class of steroid made (15). The adrenal zona glomerulosa does not express P450c17 (16) and hence produces 17-deoxysteroids leading to aldosterone. The adrenal zona fasciculata expresses the 17 $\alpha$ -hydroxylase activity but very little of the 17,20-lyase activity of P450c17, and hence produces 21-carbon, 17-hydroxysteroids, leading to cortisol. The adrenal reticularis, testicular Leydig cells, and ovarian theca cells express both the 17 $\alpha$ -hydroxylase and 17,20-lyase activities of P450c17, and hence produce the 19-carbon 17-hydroxysteroid DHEA, the precursor of sex steroids. The discrimination between a cell having only hydroxylase activity or both hydroxylase and lyase activities is based on the abundance of the redox partner, P450 oxidoreductase, and the presence of two factors that facilitate the interaction of P450c17 and P450 oxidoreductase: the serine phosphorylation of P450c17 and the allosteric action of cytochrome b5 (17). Correspondingly, most P450c17 mutations causing isolated 17,20-lyase deficiency lie in the redox-partner binding site of P450c17 (6, 7, 18).

The R96W mutation has been reported in two French-Canadian siblings with 46,XY pseudohermaphroditism and combined 17 $\alpha$ -hydroxylase/17,20-lyase deficiency (12). Structural modeling suggests that R96 lies within flanking strand 2 of  $\beta$ -sheet 1, and the guanidinium group of R96 appears to form hydrogen bonds with carbonyl groups of residues A113 and F114 (19). Removal of this positively charged group, which occurs in mutation R96W, appears to destabilize the protein by disrupting this interaction between the two domains, leading to complete inactivity of the enzyme (20). Although our patient's parental DNA was not available, we would speculate that the French-Canadian mother donated the R96W mutation.

The H373D mutation is novel, but the related H373L mutation has been described in two Japanese sisters with hypertension and sexual infantilism (9). The H373L mutant lacked 17 $\alpha$ -hydroxylase and 17,20-lyase activities in transfected COS-1 cells, and membrane preparations from *E. coli* expressing H373L had a spectral peak at 420 nm rather than at 450 nm. These results suggested that the H373L mutant does not incorporate the heme group properly, suggesting a role for H373 in heme binding. Computational modeling of P450c17 shows that H373 does not interact directly with the heme, but instead forms a hydrogen bond with the carboxylic acid group of E391, which lies in an adjacent  $\beta$  sheet near the membrane-attachment domain (19). Thus mutation of H373, either to an aliphatic residue (H373L) or to a polar one (H373D) appears to create a global alteration in the structure of P450c17 that

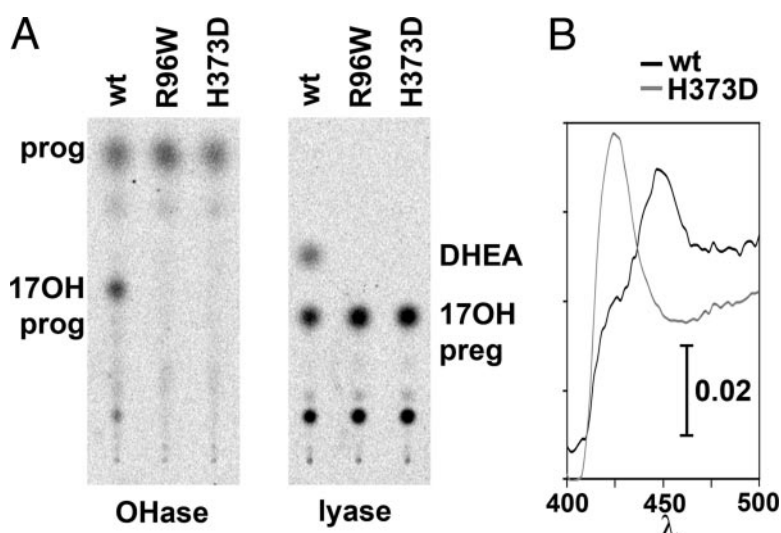

**FIG. 1.** Characterization of the P450c17 mutants. A, Autoradiogram of a thin layer chromatogram showing that wild-type (wt) P450c17 converts progesterone (Prog) to 17-hydroxyprogesterone (17OHP) and 17 $\alpha$ -hydroxypregnenolone (17OHPreg) to DHEA. The mutations R96W and H373D have no detectable 17 $\alpha$ -hydroxylase (OHase) or 17,20-lyase (lyase) activity. B, CO-reduced difference spectra from *E. coli* membranes expressing wt P450c17 or H373D mutation. The wild-type protein has the expected peak at 450 nm, whereas the mutant peak is at 420 nm.

secondarily prevents heme binding. The change of histidine to aspartic acid maintains a polar residue but increases its electro-negativity, apparently causing a change in protein folding.

The complete loss of both 17 $\alpha$ -hydroxylase and 17,20-lyase activities in these two different point mutations in H373 indicates that this locus is essential for enzyme activity. Identification and biochemical characterization of novel CYP17A1 mutations provides useful information about the structure and enzymatic activity of P450c17. Although rare, 17 $\alpha$ -hydroxylase deficiency should be considered in any phenotypic female with delayed puberty and low renin hypertension; the diagnosis is made by an ACTH test with a complete profile of adrenal steroids, especially the precursors and products of the 17 $\alpha$ -hydroxylase and 17,20-lyase reactions.

## Acknowledgments

Address all correspondence and requests for reprints to: Walter L. Miller, M.D., Professor of Pediatrics and Chief of Endocrinology, HSE 1427, University of California–San Francisco, San Francisco, California 94143-0978. E-mail: wmlab@ucsf.edu.

This study was supported by the Thailand Research Fund, by funds from the University of California–San Francisco (UCSF) Division of Pediatric Endocrinology, and by a Bridge Grant from the UCSF School of Medicine.

Disclosure Summary: The authors have nothing to disclose.

## References

1. Nakajin S, Shinoda M, Haniu M, Shively JE, Hall PF 1984 C<sub>21</sub> steroid side-chain cleavage enzyme from porcine adrenal microsomes. Purification and characterization of the 17 $\alpha$ -hydroxylase/C<sub>17,20</sub> lyase cytochrome P450. *J Biol Chem* 259:3971–3976
2. Chung BC, Picado-Leonard J, Haniu M, Bienkowski M, Hall PF, Shively JE, Miller WL 1987 Cytochrome P450c17 (steroid 17 $\alpha$ -hydroxylase/17,20 lyase): cloning of human adrenal and testis cDNAs indicates the same gene is expressed in both tissues. *Proc Natl Acad Sci USA* 84:407–411
3. Picado-Leonard J, Miller WL 1987 Cloning and sequence of the human gene encoding P450c17 (steroid 17 $\alpha$ -hydroxylase/17,20 lyase): similarity to the gene for P450c21. *DNA* 6:439–448
4. Sparkes RS, Klisak I, Miller WL 1991 Regional mapping of genes encoding human steroidogenic enzymes: P450scs to 15q23-q24, adrenodoxin to 11q22; adrenodoxin reductase to 17q24-q25; and P450c17 to 10q24-q25. *DNA Cell Biol* 10:359–365
5. Biglieri EG, Herron MA, Brust N 1966 17 $\alpha$ -Hydroxylation deficiency in man. *J Clin Invest* 15:1945–1954
6. Geller DH, Auchus RJ, Mendonça BB, Miller WL 1997 The genetic and functional basis of isolated 17,20 lyase deficiency. *Nat Genet* 17:201–205
7. Van Den Akker EL, Koper JW, Boehmer AL, Themmen AP, Verhoef-Post M, Timmerman MA, Otten BJ, Drop SL, De Jong FH 2002 Differential inhibition of 17 $\alpha$ -hydroxylase and 17,20 lyase activities by three novel missense CYP17 mutations identified in patients with P450c17 deficiency. *J Clin Endocrinol Metab* 87:5714–5721
8. Sherbet DP, Tiosano D, Kwist KM, Hochberg Z, Auchus RJ 2003 CYP17 mutation E305G causes isolated 17,20 lyase deficiency by selectively altering substrate binding. *J Biol Chem* 278:48563–48569
9. Monno S, Ogawa H, Date T, Fujioka M, Miller WL, Kobayashi M 1993 Mutation of histidine 373 to leucine in cytochrome P450c17 causes 17 $\alpha$ -hydroxylase deficiency. *J Biol Chem* 268:25811–25817
10. Lin D, Harikrishna JA, Moore CCD, Jones KL, Miller WL 1991 Missense mutation Ser<sup>106</sup>→Pro causes 17 $\alpha$ -hydroxylase deficiency. *J Biol Chem* 266:15992–15998
11. Brock BJ, Waterman MR 1999 Biochemical differences between rat and human cytochrome P450c17 support the different steroidogenic needs of these two species. *Biochemistry* 38:1598–1606
12. Laflamme N, Leblanc JF, Mailloux J, Faure N, Labrie F, Simard J 1996 Mutation R96W in cytochrome P450c17 gene causes combined 17 $\alpha$ -hydroxylase/17,20 lyase deficiency in two French Canadian patients. *J Clin Endocrinol Metab* 81:264–268
13. Lin D, Zhang LH, Chiao E, Miller WL 1994 Modeling and mutagenesis of the active site of human P450c17. *Mol Endocrinol* 8:392–402
14. Omura T, Sato R 1964 The carbon monoxide-binding pigment of liver microsomes. *J Biol Chem* 239:2370–2378
15. Miller WL, Auchus RJ, Geller DH 1997 The regulation of 17,20 lyase activity. *Steroids* 62:133–142
16. Suzuki T, Sasano H, Takeyama J, Kaneko C, Freije WA, Carr BR, Rainey WE 2000 Developmental changes in steroidogenic enzymes in human postnatal adrenal cortex: immunohistochemical studies. *Clin Endocrinol (Oxf)* 53:739–747
17. Miller WL 2005 Regulation of steroidogenesis by electron transfer. *Endocrinology* 146:2544–2550
18. Geller DH, Auchus RJ, Miller WL 1999 P450c17 mutations R347H and R358Q selectively disrupt 17,20-lyase activity by disrupting interactions with P450 oxidoreductase and cytochrome b<sub>5</sub>. *Mol Endocrinol* 13:167–175
19. Auchus RJ, Miller WL 1999 Molecular modeling of human P450c17 (17 $\alpha$ -hydroxylase/17,20-lyase): insights into reaction mechanisms and effects of mutations. *Mol Endocrinol* 13:1169–1182
20. Brooke AM, Taylor NF, Shepherd JH, Gore ME, Ahmad T, Lin L, Rumsby G, Papari-Zareei M, Auchus RJ, Achermann JC, Monson JP 2006 A novel point mutation in P450c17 (CYP17) causing combined 17 $\alpha$ -hydroxylase/17,20 lyase deficiency. *J Clin Endocrinol Metab* 91:2428–2431
